# Supplementary material for: Self-supporting cotton-derived 3D carbon–Si nanoarchitecture for solvent-free fabrication of high-performance lithium-ion anodes
Source: Royal Society of Chemistry journal article supplement (doi:10.1039/d5ra10046a), 2026-04-07
Supplement: d5ra10046a1.pdf [file d5ra10046a1.pdf]

# **Self-supporting cotton-derived 3D carbon–Si nanoarchitecture for solvent-free fabrication of high-performance lithium-ion anodes**

Nguyen Van Tu<sup>1\*</sup>, Pham Van Trinh<sup>1</sup>, Nguyen Van Chuc<sup>1</sup>, Cao Thi Thanh<sup>1</sup>, Bui Hung Thang<sup>1</sup>, Pham Thi Nam<sup>1</sup>, Nguyen Hoang Tung<sup>1</sup>, Pham Duy Long<sup>1</sup>, Nguyen Thanh Tung<sup>1</sup>, Tran Dai Lam<sup>1</sup>, Phan Ngoc Minh<sup>2</sup>, Nguyen Van Hao<sup>3</sup>, Vu Xuan Hoa<sup>3</sup>, Vu Van Ngoc<sup>4</sup>, Dinh Trong Thang<sup>4</sup>, Tran Van Hau<sup>1\*</sup>

<sup>1</sup>Institute of Materials Science, Vietnam Academy of Science and Technology, Hanoi, Vietnam

<sup>2</sup>Graduate University of Science and Technology, Vietnam Academy of Science and Technology, Hanoi, Vietnam

<sup>3</sup>Institute of Science and Technology, TNU-University of Sciences, Thai Nguyen, Vietnam.

<sup>4</sup>University of Science, Vietnam National University, Hanoi, Vietnam

Corresponding email: [tunv@ims.vast.vn](mailto:tunv@ims.vast.vn); [hautv@ims.vast.ac.vn](mailto:hautv@ims.vast.ac.vn)

Table S1. Estimated specific capacity and corresponding C-rate definition for Si/C composite electrodes

| Composition (wt%) | Estimated specific capacity (mAh g <sup>-1</sup> ) | Definition of 1C (mA g <sup>-1</sup> ) | 0.25C | 0.5C | 0.75C | 1C    |
|-------------------|----------------------------------------------------|----------------------------------------|-------|------|-------|-------|
| C (100%)          | 372                                                | 372                                    | 93    | 186  | 279   | 372   |
| Si(10%)/C(90%)    | 628                                                | 628                                    | 157   | 314  | 471   | 628   |
| Si(20%)/C(80%)    | 956                                                | 956                                    | 239   | 478  | 717   | 956   |
| Si(30%)/C(70%)    | 1,284                                              | 1,284                                  | 321   | 642  | 963   | 1,284 |
| Si(40%)/C(60%)    | 1,612                                              | 1,612                                  | 403   | 806  | 1029  | 1,612 |

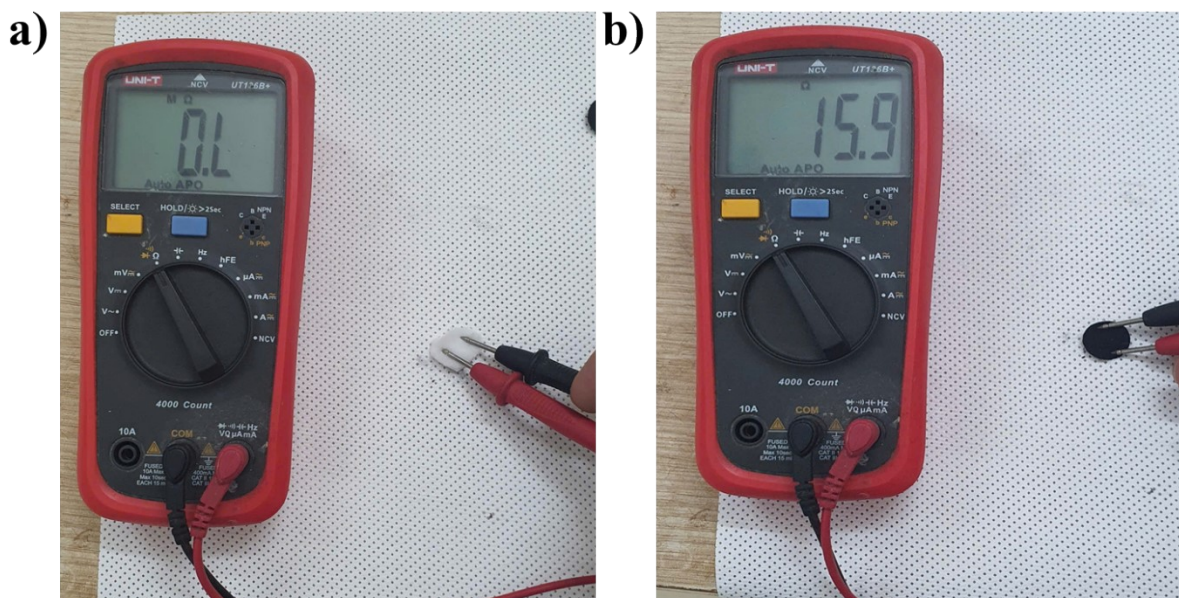

Figure S1. Surface resistance of (a) pristine cotton and (b) 3D-CC@Si

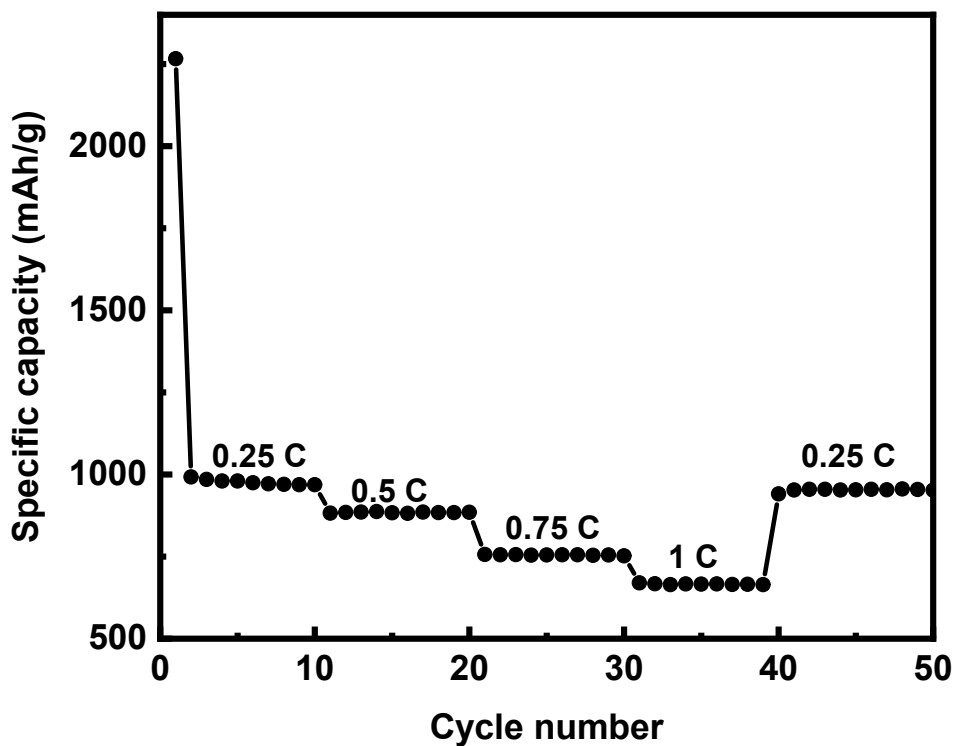

Figure S2. Rate capabilities at various C-rates from 0.25 to 1C.

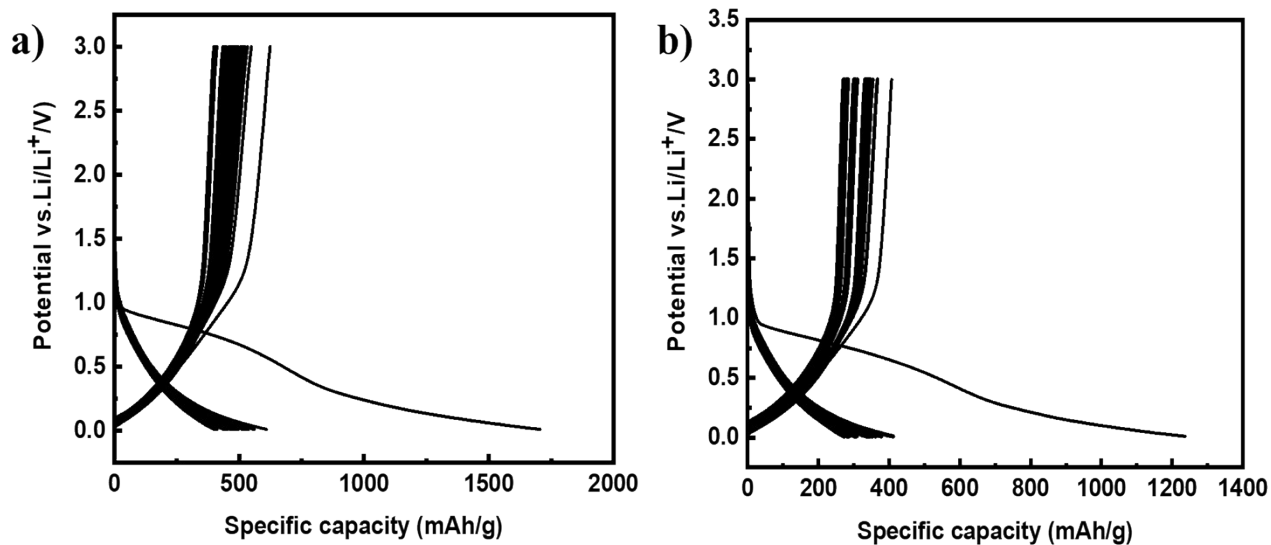

Figure S3. Long-term cycling performance of 3D-CC@Si composite under high C-rates
